# Supplementary material for: Movement Disorders in Prionopathies: A Systematic Review
Source: PubMed Central journal article supplement — Tremor Other Hyperkinet Mov (N Y). 2019 Dec 12;9:10.7916/tohm.v0.712. doi: 10.7916/tohm.v0.712 (PMC6925394; doi:10.7916/tohm.v0.712), 2019-12-12
Supplement: tre-09-712-s002.pdf [file tre-09-712-s002.pdf]

**Table 1. Clinical and demographic features of human prionopathies in the published literature. A sensitivity analysis after removing missing data from cognitive behavioral disorder**

|                                    | <b>sCJD</b> | <b>vCJD</b>   | <b>iCJD</b>     | <b>gCJD</b> | <b>FFI</b>    | <b>GSS</b>  | <b>p-value</b> |
|------------------------------------|-------------|---------------|-----------------|-------------|---------------|-------------|----------------|
|                                    | <b>N(%)</b> | <b>N(%)</b>   | <b>N(%)</b>     | <b>N(%)</b> | <b>N(%)</b>   | <b>N(%)</b> |                |
| <b>N</b>                           | <b>133</b>  | <b>22</b>     | <b>12</b>       | <b>43</b>   | <b>28</b>     | <b>45</b>   |                |
| Age at onset (y), median (IQR)     | 62 (53, 69) | 36 (26, 41)   | 45.5 (37, 52.5) | 61 (46, 69) | 45 (30, 53.5) | 45 (37, 56) | <0.001         |
| Disease duration (m), median (IQR) | 8 (3, 17)   | 16.5 (10, 18) | 9.5 (6.5, 12)   | 5 (4, 16)   | 11 (8.5, 13)  | 60 (15, 96) | <0.001         |
| <b>Cognitive/Behavioral</b>        |             |               |                 |             |               |             | 0.002          |
| Onset                              | 95 (71.4%)  | 18 (81.8%)    | 8 (66.7%)       | 34 (79.1%)  | 10 (35.7%)    | 29 (64.4%)  |                |
| Later in course                    | 38 (28.6%)  | 4 (18.2%)     | 4 (33.3%)       | 9 (20.9%)   | 18 (64.3%)    | 16 (35.6%)  |                |
| Not reported                       | 0 (0%)      | 0             | 0 (0%)          | 0 (0%)      | 0 (0%)        | 0 (0%)      |                |
| <b>Movement Disorders</b>          |             |               |                 |             |               |             | 0.03           |
| Onset                              | 60 (45.1%)  | 5 (22.7%)     | 8 (66.7%)       | 12 (27.9%)  | 8 (28.6%)     | 25 (55.6%)  |                |
| Later in course                    | 71 (53.4%)  | 17 (77.3%)    | 4 (33.3%)       | 30 (69.8%)  | 20 (71.4%)    | 18 (40%)    |                |
| Not reported                       | 2 (1.5%)    | 0 (0%)        | 0 (0%)          | 1 (2.3%)    | 0 (0%)        | 2 (4.4%)    |                |
| <b>Dysautonomia</b>                |             |               |                 |             |               |             | <0.001         |
| Onset                              | 0 (0%)      | 0 (0%)        | 0 (0%)          | 0 (0%)      | 5 (17.9%)     | 0 (0%)      |                |
| Later in course                    | 1 (0.8%)    | 0 (0%)        | 1 (8.3%)        | 7 (16.3%)   | 15 (53.6%)    | 0 (0%)      |                |
| Not reported                       | 132 (99.2%) | 22 (100%)     | 11 (91.7%)      | 36 (83.7%)  | 8 (28.6%)     | 45 (100%)   |                |
| <b>Sleep disorder</b>              |             |               |                 |             |               |             | <0.001         |
| Onset                              | 2 (1.5%)    | 0 (0%)        | 1 (8.3%)        | 7 (16.3%)   | 19 (67.9%)    | 0 (0%)      |                |
| Later in course                    | 0 (0%)      | 0 (0%)        | 0 (0%)          | 5 (11.6%)   | 7 (25%)       | 0 (0%)      |                |
| Not reported                       | 131 (98.5%) | 22 (100%)     | 11 (91.7%)      | 31 (72.1%)  | 2 (7.1%)      | 45 (100%)   |                |

IQR: Interquartile range; sCJD: Sporadic Creutzfeldt-Jakob disease; vCJD: Variant Creutzfeldt-Jakob disease; iCJD: Iatrogenic Creutzfeldt-Jakob disease; gCJD: Genetic Creutzfeldt-Jakob disease; FFI: Fatal familial insomnia; GSS: Gerstmann-Sträussler-Scheinker disease; p-value: Wilcoxon rank sum test for continuous data and Chi square test for categorical data

**Table 2. Prevalence of movement disorders in human prionopathies. A sensitivity analysis after removing missing data from cognitive behavioral disorder**

|              | <b>sCJD</b> | <b>vCJD</b> | <b>iCJD</b> | <b>gCJD</b> | <b>FFI</b>  | <b>GSS</b>  | <b>p-value</b> |
|--------------|-------------|-------------|-------------|-------------|-------------|-------------|----------------|
|              | <b>N(%)</b> | <b>N(%)</b> | <b>N(%)</b> | <b>N(%)</b> | <b>N(%)</b> | <b>N(%)</b> |                |
| <b>N</b>     | <b>133</b>  | <b>22</b>   | <b>12</b>   | <b>43</b>   | <b>28</b>   | <b>45</b>   |                |
| Gait ataxia  | 82 (61.7%)  | 20 (90.9%)  | 9 (75%)     | 28 (65.1%)  | 15 (53.6%)  | 32 (71.1%)  | 0.058          |
| Limb ataxia  | 50 (37.6%)  | 9 (40.9%)   | 7 (58.3%)   | 22 (51.2%)  | 7 (25%)     | 9 (20%)     | 0.017          |
| Myoclonus    | 79 (59.4%)  | 13 (59.1%)  | 8 (66.7%)   | 32 (74.4%)  | 19 (67.9%)  | 12 (26.7%)  | <0.001         |
| Tremor       | 6 (4.5%)    | 1 (4.5%)    | 1 (8.3%)    | 3 (7%)      | 4 (14.3%)   | 4 (8.9%)    | 0.41           |
| Parkinsonism | 9 (6.8%)    | 2 (9.1%)    | 1 (8.3%)    | 7 (16.3%)   | 4 (14.3%)   | 9 (20%)     | 0.14           |
| Rigidity     | 57 (42.9%)  | 7 (31.8%)   | 3 (25%)     | 25 (58.1%)  | 6 (21.4%)   | 19 (42.2%)  | 0.037          |
| Chorea       | 5 (3.8%)    | 7 (31.8%)   | 0 (0%)      | 0 (0%)      | 0 (0%)      | 2 (4.4%)    | <0.001         |
| Dystonia     | 10 (7.5%)   | 2 (9.1%)    | 0 (0%)      | 1 (2.3%)    | 0 (0%)      | 2 (4.4%)    | 0.52           |
| Gaze palsy   | 13 (9.8%)   | 3 (13.6%)   | 1 (8.3%)    | 1 (2.3%)    | 0 (0%)      | 0 (0%)      | 0.032          |

sCJD: Sporadic Creutzfeldt-Jakob disease; vCJD: Variant Creutzfeldt-Jakob disease; iCJD: Iatrogenic Creutzfeldt-Jakob disease; gCJD: Genetic Creutzfeldt-Jakob disease; FFI: Fatal familial insomnia; GSS: Gerstmann-Sträussler-Scheinker disease; p-value: Fisher's exact test

**Table 3. Time (months) from movement disorder onset until death. A sensitivity analysis after removing missing data from cognitive behavioral disorder**

|                            | sCJD          | vCJD             | iCJD           | gCJD           | FFI             | GSS               | p-value |
|----------------------------|---------------|------------------|----------------|----------------|-----------------|-------------------|---------|
| Gait ataxia, median (IQR)  | 6<br>(2, 12)  | 8<br>(5.5, 17.5) | 7<br>(6, 8)    | 4<br>(3.5, 9)  | 7<br>(4, 12)    | 52.5<br>(10.5,78) | <0.001  |
| Limb ataxia, median (IQR)  | 4<br>(2, 12)  | 7<br>(6, 18)     | 6<br>(4, 13)   | 4.5<br>(3, 9)  | 5<br>(3, 17)    | 60<br>(48, 72)    | 0.01    |
| Myoclonus, median (IQR)    | 2<br>(1, 5)   | 6<br>(3, 12)     | 4.5<br>(2, 9)  | 4<br>(2, 10)   | 5<br>(3, 8)     | 5.5<br>(2.5, 71)  | 0.003   |
| Tremor, median (IQR)       | 3<br>(1, 8)   | 35<br>(35, 35)   | 10<br>(10, 10) | 4<br>(4, 60)   | 9.5<br>(5, 13)  | 31.5<br>(2, 84)   | 0.59    |
| Parkinsonism, median (IQR) | 3<br>(2, 4)   | 4.5<br>(1, 8)    | 10<br>(10, 10) | 18<br>(16, 90) | 8.5<br>(5.5,18) | 36<br>(24, 65)    | 0.007   |
| Rigidity, median (IQR)     | 5<br>(3, 14)  | 17<br>(7, 18)    | 13<br>(8, 13)  | 5<br>(4, 16)   | 7.5<br>(5, 11)  | 36<br>(7, 96)     | <0.001  |
| Chorea, median (IQR)       | 10<br>(4, 18) | 3<br>(2, 8)      | -              | -              | -               | 2.5<br>(2, 3)     | 0.22    |
| Dystonia, median (IQR)     | 4<br>(2, 14)  | 14.5<br>(11, 18) | -              | 3<br>(3, 3)    | -               | 60.5<br>(1, 120)  | 0.66    |
| Gaze palsy, median (IQR)   | 11<br>(7, 14) | 8<br>(7, 14)     | 13<br>(13, 13) | 16<br>(16, 16) | -               | -                 | 0.69    |

IQR: Interquartile range; sCJD: *Sporadic CJD*; vCJD: *Variant Creutzfeldt-Jakob disease*; iCJD: *iatrogenic Creutzfeldt-Jakob disease*; gCJD: *Genetic Creutzfeldt-Jakob disease*; FFI: *Fatal familial insomnia*; GSS: *Gerstmann-Sträussler-Scheinker disease*; p-value: Wilcoxon rank sum test

**Table 4. Clinical and demographic features of human prionopathies in the published literature. A restricted analysis of studies published in neurological journals**

|                                    | <b>sCJD</b>    | <b>vCJD</b>         | <b>iCJD</b>    | <b>gCJD</b>    | <b>FFI</b>       | <b>GSS</b>          | <b>p-value</b> |
|------------------------------------|----------------|---------------------|----------------|----------------|------------------|---------------------|----------------|
|                                    | <b>N(%)</b>    | <b>N(%)</b>         | <b>N(%)</b>    | <b>N(%)</b>    | <b>N(%)</b>      | <b>N(%)</b>         |                |
| N                                  | 116            | 12                  | 11             | 38             | 22               | 44                  |                |
| Age at onset (y), median (IQR)     | 62<br>(54, 69) | 26.5<br>(21, 37.5)  | 44<br>(35, 53) | 62<br>(54, 69) | 38.5<br>(25, 53) | 48<br>(36.5, 57)    | <0.001         |
| Disease duration (m), median (IQR) | 7<br>(4, 18)   | 15.5<br>(7.5, 19.5) | 10<br>(6, 13)  | 5<br>(4, 12)   | 12<br>(9, 14)    | 58.5<br>(22.5, 102) | <0.001         |
| <b>Cognitive/Behavioral</b>        |                |                     |                |                |                  |                     | 0.016          |
| Onset                              | 65 (56%)       | 10 (83.3%)          | 7 (63.6%)      | 29 (76.3%)     | 7 (31.8%)        | 27 (61.4%)          |                |
| Later in course                    | 32 (27.6%)     | 2 (16.7%)           | 4 (36.4%)      | 7 (18.4%)      | 13 (59.1%)       | 12 (27.3%)          |                |
| Not reported                       | 19 (16.4%)     | 0 (0%)              | 0 (0%)         | 2 (5.3%)       | 2 (9.1%)         | 5 (11.4%)           |                |
| <b>Movement Disorders</b>          |                |                     |                |                |                  |                     | 0.047          |
| Onset                              | 66 (56.9%)     | 3 (25%)             | 7 (63.6%)      | 12 (31.6%)     | 8 (36.4%)        | 27 (61.4%)          |                |
| Later in course                    | 48 (41.4%)     | 9 (75%)             | 4 (36.4%)      | 25 (65.8%)     | 14 (63.6%)       | 15 (34.1%)          |                |
| Not reported                       | 2 (1.7%)       | 0 (0%)              | 0 (0%)         | 1 (2.6%)       | 0 (0%)           | 2 (4.5%)            |                |
| <b>Dysautonomia</b>                |                |                     |                |                |                  |                     | <0.001         |
| Onset                              | 0 (0%)         | 0 (0%)              | 0 (0%)         | 0 (0%)         | 2 (9.1%)         | 0 (0%)              |                |
| Later in course                    | 1 (0.9%)       | 0 (0%)              | 1 (9.1%)       | 5 (13.2%)      | 13 (59.1%)       | 0 (0%)              |                |
| Not reported                       | 115 (99.1%)    | 12 (100%)           | 10 (90.9%)     | 33 (86.8%)     | 7 (31.8%)        | 44 (100%)           |                |
| <b>Sleep disorder</b>              |                |                     |                |                |                  |                     | <0.001         |
| Onset                              | 1 (0.9%)       | 0 (0%)              | 1 (9.1%)       | 6 (15.8%)      | 13 (59.1%)       | 0 (0%)              |                |
| Later in course                    | 1 (0.9%)       | 0 (0%)              | 0 (0%)         | 1 (2.6%)       | 7 (31.8%)        | 0 (0%)              |                |
| Not reported                       | 114 (98.3%)    | 12 (100%)           | 10 (90.9%)     | 31 (81.6%)     | 2 (9.1%)         | 44 (100%)           |                |

IQR: Interquartile range; sCJD: Sporadic Creutzfeldt-Jakob disease; vCJD: Variant Creutzfeldt-Jakob disease; iCJD: Iatrogenic Creutzfeldt-Jakob disease; gCJD: Genetic Creutzfeldt-Jakob disease; FFI: Fatal familial insomnia; GSS: Gerstmann-Sträussler-Scheinker disease; p-value: Wilcoxon rank sum test for continuous data and Chi square test for categorical data

**Table 5. Prevalence of movement disorders in human prionopathies. A restricted analysis of studies published in neurological journals**

|              | <b>sCJD</b> | <b>vCJD</b> | <b>iCJD</b> | <b>gCJD</b> | <b>FFI</b>  | <b>GSS</b>  | <b>p-value</b> |
|--------------|-------------|-------------|-------------|-------------|-------------|-------------|----------------|
|              | <b>N(%)</b> | <b>N(%)</b> | <b>N(%)</b> | <b>N(%)</b> | <b>N(%)</b> | <b>N(%)</b> |                |
| N            | 116         | 12          | 11          | 38          | 22          | 44          |                |
| Gait ataxia  | 76 (65.5%)  | 10 (83.3%)  | 8 (72.7%)   | 27 (71.1%)  | 14 (63.6%)  | 31 (70.5%)  | 0.85           |
| Limb ataxia  | 48 (41.4%)  | 2 (16.7%)   | 7 (63.6%)   | 21 (55.3%)  | 6 (27.3%)   | 10 (22.7%)  | 0.006          |
| Myoclonus    | 67 (57.8%)  | 6 (50%)     | 8 (72.7%)   | 27 (71.1%)  | 15 (68.2%)  | 11 (25%)    | <0.001         |
| Tremor       | 5 (4.3%)    | 1 (8.3%)    | 1 (9.1%)    | 3 (7.9%)    | 4 (18.2%)   | 4 (9.1%)    | 0.22           |
| Parkinsonism | 10 (8.6%)   | 2 (16.7%)   | 1 (9.1%)    | 5 (13.2%)   | 1 (4.5%)    | 9 (20.5%)   | 0.29           |
| Rigidity     | 48 (41.4%)  | 5 (41.7%)   | 3 (27.3%)   | 21 (55.3%)  | 7 (31.8%)   | 18 (40.9%)  | 0.47           |
| Chorea       | 3 (2.6%)    | 3 (25%)     | 0 (0%)      | 0 (0%)      | 0 (0%)      | 2 (4.5%)    | 0.024          |
| Dystonia     | 12 (10.3%)  | 2 (16.7%)   | 0 (0%)      | 1 (2.6%)    | 0 (0%)      | 2 (4.5%)    | 0.22           |
| Gaze palsy   | 16 (13.8%)  | 2 (16.7%)   | 1 (9.1%)    | 1 (2.6%)    | 0 (0%)      | 0 (0%)      | 0.009          |

sCJD: Sporadic Creutzfeldt-Jakob disease; vCJD: Variant Creutzfeldt-Jakob disease; iCJD: Iatrogenic Creutzfeldt-Jakob disease; gCJD: Genetic Creutzfeldt-Jakob disease; FFI: Fatal familial insomnia; GSS: Gerstmann-Sträussler-Scheinker disease; p-value: Fisher's exact test

**Table 6. Time (months) from movement disorder onset until death. A restricted analysis of studies published in neurological journals**

|                            | sCJD             | vCJD             | iCJD           | gCJD           | FFI             | GSS              | p-value |
|----------------------------|------------------|------------------|----------------|----------------|-----------------|------------------|---------|
| Gait ataxia, median (IQR)  | 5.5<br>(2, 12.5) | 8<br>(7, 17)     | 7<br>(5, 10.5) | 4<br>(3, 9)    | 10<br>(5, 12)   | 56<br>(9, 84)    | <0.001  |
| Limb ataxia, median (IQR)  | 4<br>(2, 12)     | 19<br>(7, 31)    | 6<br>(4, 13)   | 5<br>(3, 9)    | 11.5<br>(5, 20) | 58.5<br>(48, 72) | 0.002   |
| Myoclonus, median (IQR)    | 2<br>(2, 6)      | 3.5<br>(2, 11)   | 4.5<br>(2, 9)  | 4<br>(2, 8)    | 5<br>(2, 9)     | 5<br>(2, 88)     | 0.054   |
| Tremor, median (IQR)       | 3<br>(1, 3)      | 35<br>(35,35)    | 10<br>(10, 10) | 4<br>(4, 60)   | 9.5<br>(5, 13)  | 31.5<br>(2, 84)  | 0.51    |
| Parkinsonism, median (IQR) | 3.5<br>(3, 20)   | 4.5<br>(1, 8)    | 10<br>(10, 10) | 60<br>(16, 90) | 27<br>(27, 27)  | 36<br>(24, 65)   | 0.024   |
| Rigidity, median (IQR)     | 5.5<br>(3, 16.5) | 17<br>(14, 18)   | 13<br>(8, 13)  | 5<br>(3, 12)   | 9<br>(5, 17)    | 42<br>(7, 108)   | <0.001  |
| Chorea, median (IQR)       | 4<br>(2, 48)     | 2<br>(2, 8)      | -              | -              | -               | 2.5<br>(2, 3)    | 0.63    |
| Dystonia, median (IQR)     | 4<br>(2, 10)     | 14.5<br>(11, 18) | -              | 3<br>(3, 3)    | -               | 60.5<br>(1, 120) | 0.58    |
| Gaze palsy, median (IQR)   | 10<br>(3.5, 14)  | 11<br>(8, 14)    | 13<br>(13, 13) | 16<br>(16, 16) | -               | -                | 0.64    |

IQR: Interquartile range; sCJD: *Sporadic CJD*; vCJD: *Variant Creutzfeldt-Jakob disease*; iCJD: *iatrogenic Creutzfeldt-Jakob disease*; gCJD: *Genetic Creutzfeldt-Jakob disease*; FFI: *Fatal familial insomnia*; GSS: *Gerstmann-Sträussler-Scheinker disease*; p-value: Wilcoxon rank sum test

**Table 7. Clinical and demographic features of human prionopathies in the published literature. A sensitivity analysis of studies published in neurological journals after removing missing data from cognitive behavioral disorder**

|                                    | sCJD           | vCJD                | iCJD           | gCJD             | FFI                | GSS             | p-value |
|------------------------------------|----------------|---------------------|----------------|------------------|--------------------|-----------------|---------|
|                                    | N(%)           | N(%)                | N(%)           | N(%)             | N(%)               | N(%)            |         |
| N                                  | 97             | 12                  | 11             | 36               | 20                 | 39              |         |
| Age at onset (y), median (IQR)     | 62<br>(54, 68) | 26.5<br>(21, 37.5)  | 44<br>(35, 53) | 62<br>(54, 69.5) | 38.5<br>(25, 53.5) | 45<br>(36, 56)  | <0.001  |
| Disease duration (m), median (IQR) | 8<br>(4, 18)   | 15.5<br>(7.5, 19.5) | 10<br>(6, 13)  | 5<br>(3.5, 12)   | 12<br>(8.5, 13.5)  | 60<br>(15, 108) | <0.001  |
| <b>Cognitive/Behavioral</b>        |                |                     |                |                  |                    |                 | 0.016   |
| Onset                              | 65 (67%)       | 10 (83%)            | 7 (64%)        | 29 (81%)         | 7 (35%)            | 27 (69%)        |         |
| Later in course                    | 32 (33%)       | 2 (17%)             | 4 (36%)        | 7 (19%)          | 13 (65%)           | 12 (31%)        |         |
| Not reported                       | 0 (0%)         | 0                   | 0 (0%)         | 0 (0%)           | 0 (0%)             | 0 (0%)          |         |
| <b>Movement Disorders</b>          |                |                     |                |                  |                    |                 | 0.11    |
| Onset                              | 48 (49%)       | 3 (25%)             | 7 (64%)        | 10 (28%)         | 6 (30%)            | 22 (56%)        |         |
| Later in course                    | 47 (48%)       | 9 (75%)             | 4 (36%)        | 25 (69%)         | 14 (70%)           | 15 (38%)        |         |
| Not reported                       | 2 (2%)         | 0 (0%)              | 0 (0%)         | 1 (3%)           | 0 (0%)             | 2 (5%)          |         |
| <b>Dysautonomia</b>                |                |                     |                |                  |                    |                 | <0.001  |
| Onset                              | 0 (0%)         | 0 (0%)              | 0 (0%)         | 0 (0%)           | 2 (10%)            | 0 (0%)          |         |
| Later in course                    | 1 (1%)         | 0 (0%)              | 1 (9%)         | 4 (11%)          | 12 (60%)           | 0 (0%)          |         |
| Not reported                       | 96 (99%)       | 12 (100%)           | 10 (91%)       | 32 (89%)         | 6 (30%)            | 39 (100%)       |         |
| <b>Sleep disorder</b>              |                |                     |                |                  |                    |                 | <0.001  |
| Onset                              | 1 (1%)         | 0 (0%)              | 1 (9%)         | 6 (16%)          | 13 (65%)           | 0 (0%)          |         |
| Later in course                    | 0 (0%)         | 0 (0%)              | 0 (0%)         | 1 (3%)           | 6 (30%)            | 0 (0%)          |         |
| Not reported                       | 96 (99%)       | 12 (100%)           | 10 (91%)       | 29 (81%)         | 1 (5%)             | 39 (100%)       |         |

IQR: Interquartile range; sCJD: Sporadic Creutzfeldt-Jakob disease; vCJD: Variant Creutzfeldt-Jakob disease; iCJD: Iatrogenic Creutzfeldt-Jakob disease; gCJD: Genetic Creutzfeldt-Jakob disease; FFI: Fatal familial insomnia; GSS: Gerstmann-Sträussler-Scheinker disease; p-value: Wilcoxon rank sum test for continuous data and Chi square test for categorical data

**Table 8. Prevalence of movement disorders in human prionopathies. A sensitivity analysis of studies published in neurological journals after removing missing data from cognitive behavioral disorder**

|              | sCJD     | vCJD     | iCJD    | gCJD     | FFI      | GSS      | p-value |
|--------------|----------|----------|---------|----------|----------|----------|---------|
|              | N(%)     | N(%)     | N(%)    | N(%)     | N(%)     | N(%)     |         |
| N            | 97       | 12       | 11      | 36       | 20       | 39       |         |
| Gait ataxia  | 62 (64%) | 10 (83%) | 8 (73%) | 25 (69%) | 12 (60%) | 26 (67%) | 0.81    |
| Limb ataxia  | 35 (36%) | 2 (17%)  | 7 (64%) | 19 (53%) | 5 (25%)  | 9 (23%)  | 0.018   |
| Myoclonus    | 58 (60%) | 6 (50%)  | 8 (73%) | 27 (75%) | 14 (70%) | 11 (28%) | <0.001  |
| Tremor       | 5 (5%)   | 1 (8%)   | 1 (9%)  | 3 (8%)   | 4 (20%)  | 4 (10%)  | 0.3     |
| Parkinsonism | 7 (7%)   | 2 (17%)  | 1 (9%)  | 5 (14%)  | 1 (5%)   | 9 (23%)  | 0.24    |
| Rigidity     | 40 (41%) | 5 (42%)  | 3 (27%) | 20 (56%) | 6 (30%)  | 17 (44%) | 0.44    |
| Chorea       | 2 (2%)   | 3 (25%)  | 0 (0%)  | 0 (0%)   | 0 (0%)   | 2 (5%)   | 0.02    |
| Dystonia     | 9 (9%)   | 2 (17%)  | 0 (0%)  | 1 (3%)   | 0 (0%)   | 2 (5%)   | 0.34    |
| Gaze palsy   | 12 (12%) | 2 (17%)  | 1 (9%)  | 1 (3%)   | 0 (0%)   | 0 (0%)   | 0.032   |

sCJD: Sporadic Creutzfeldt-Jakob disease; vCJD: Variant Creutzfeldt-Jakob disease; iCJD: Iatrogenic Creutzfeldt-Jakob disease; gCJD: Genetic Creutzfeldt-Jakob disease; FFI: Fatal familial insomnia; GSS: Gerstmann-Sträussler-Scheinker disease; p-value: Fisher's exact test

**Table 9. Time (months) from movement disorder onset until death. A sensitivity analysis of studies published in neurological journals after removing missing data from cognitive behavioral disorder**

|                            | sCJD           | vCJD             | iCJD           | gCJD            | FFI            | GSS              | p-value |
|----------------------------|----------------|------------------|----------------|-----------------|----------------|------------------|---------|
| Gait ataxia, median (IQR)  | 6.5<br>(2, 13) | 8<br>(7, 17)     | 7<br>(5,10.5)  | 4<br>(3, 8)     | 9<br>(5, 12)   | 52.5<br>(6, 72)  | <0.001  |
| Limb ataxia, median (IQR)  | 4<br>(2, 12)   | 19<br>(7, 31)    | 6<br>(4, 13)   | 4<br>(3, 7)     | 6<br>(5, 17)   | 60<br>(48, 72)   | 0.011   |
| Myoclonus, median (IQR)    | 2<br>(2, 6)    | 3.5<br>(2, 11)   | 4.5<br>(2, 9)  | 4<br>(2, 8)     | 5<br>(2, 9)    | 5<br>(2, 88)     | 0.13    |
| Tremor, median (IQR)       | 3<br>(1, 3)    | 35<br>(35, 35)   | 10<br>(10, 10) | 4<br>(4, 60)    | 9.5<br>(5, 13) | 31.5<br>(2, 84)  | 0.51    |
| Parkinsonism, median (IQR) | 3<br>(3, 20)   | 4.5<br>(1, 8)    | 10<br>(10,10)  | 60<br>(16,90)   | 27<br>(27, 27) | 36<br>(24, 65)   | 0.028   |
| Rigidity, median (IQR)     | 6<br>(3, 20)   | 17<br>(14, 18)   | 13<br>(8, 13)  | 4.5<br>(2.5,14) | 7.5<br>(5, 11) | 36<br>(7, 96)    | 0.004   |
| Chorea, median (IQR)       | 10<br>(4, 18)  | 3<br>(2, 8)      | -              | -               | -              | 2.5<br>(2, 3)    | 0.22    |
| Dystonia, median (IQR)     | 4<br>(2,14)    | 14.5<br>(11, 18) | -              | 3<br>(3, 3)     | -              | 60.5<br>(1, 120) | 0.66    |
| Gaze palsy, median (IQR)   | 11<br>(7,14)   | 8<br>(7, 14)     | 13<br>(13,13)  | 16<br>(16, 16)  | -              | -                | 0.69    |

IQR: Interquartile range; sCJD: *Sporadic CJD*; vCJD: *Variant Creutzfeldt-Jakob disease*; iCJD: *latrogenic Creutzfeldt-Jakob disease*; gCJD: *Genetic Creutzfeldt-Jakob disease*; FFI: *Fatal familial insomnia*; GSS: *Gerstmann-Sträussler-Scheinker disease*; p-value: Wilcoxon rank sum test
