# Supplementary figures and images for: Movement Disorders in Prionopathies: A Systematic Review
Source: PubMed Central journal article supplement — Tremor Other Hyperkinet Mov (N Y). 2019 Dec 12;9:10.7916/tohm.v0.712. doi: 10.7916/tohm.v0.712 (PMC6925394; doi:10.7916/tohm.v0.712), 2019-12-12

**Figure 1.** Flow diagram of search strategy.

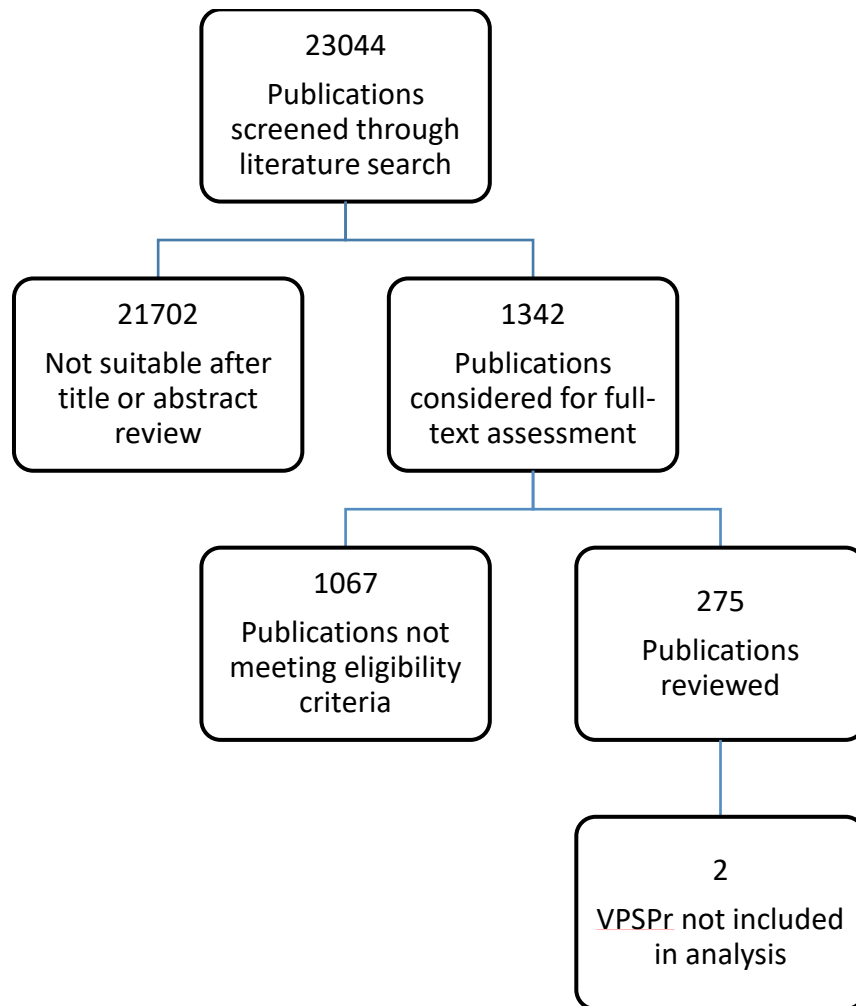

Supplement: tre-09-712-s001.pdf [file tre-09-712-s001.pdf]
